# Supplementary material for: Polo kinase recruitment via the constitutive centromere-associated network at the kinetochore elevates centromeric RNA
Source: PubMed Central journal article supplement (PMC7455000; doi:10.1371/journal.pgen.1008990), 2020-08-18
Supplement: pgen.1008990.s001.pdf [file pgen.1008990.s001.pdf]

**Table S1. Strains and plasmids used in this study.**

| <i>Saccharomyces cerevisiae</i> strains: |                                                                                                                         |                        |
|------------------------------------------|-------------------------------------------------------------------------------------------------------------------------|------------------------|
| Strain                                   | Relevant genotype                                                                                                       | Reference              |
| BY4741                                   | <i>MATa his3Δ1 leu2Δ0 met15Δ0 ura3Δ0</i>                                                                                | Brachmann et al. 1998  |
| W8164-2B                                 | <i>MATα CEN1-16::Gal-KI-URA3</i>                                                                                        | Reid et al. 2011       |
| GFP strains                              | <i>MATa his3Δ1 leu2Δ0 met15Δ0 ura3Δ0 ORF- GFP::HIS3MX6</i>                                                              | Huh et al. 2003        |
| Deletion strains                         | <i>MATa his3Δ1 leu2Δ0 lys2Δ0 ura3Δ0 orfΔ::KANMX</i>                                                                     | Winzeler et al. 1999   |
| Deletion strains                         | <i>MATa his3Δ1 leu2Δ0 met15Δ0 ura3Δ0 orfΔ::KANMX</i>                                                                    | Winzeler et al. 1999   |
| YMB10337                                 | <i>MATα ura3-52 lys2-801 ade2-101 trp1Δ63 his3Δ200 leu2Δ1 CFIII (CEN3L.YPH278) HIS3 SUP11 cse4-9SA-3HA::URA3</i>        | Mishra et al. 2019     |
| T548                                     | <i>MATa his3Δ1 leu2Δ0 met15Δ0 ura3Δ0 CSE4-GFP (internal)::HIS3MX6</i>                                                   | Mishra et al. 2019     |
| T664                                     | <i>MATa his3Δ1 leu2Δ0 lys2Δ0 ura3Δ0 CSE4-YFP (internal)::HIS3MX6</i>                                                    | Mishra et al. 2019     |
| PT63-12B                                 | <i>MATa ADE2 leu2-3,112 his3-11,15 URA3 LYS2 can1-100 trp1-1 cdc20::prMET3-CDC20::TRP1 MTW1-YFP</i>                     | This study             |
| PT257                                    | <i>MATa ADE2 leu2-3,112 his3-11,15 URA3 LYS2 can1-100 trp1-1 cdc20::prMET3-CDC20::TRP1 MTW1-YFP SPC110-CFP::KANMX</i>   | This study             |
| T16                                      | <i>MATα ADE2 leu2-3,112 TRP1 lys2Δ MTW1-YFP RAD5 mad1Δ::KANMX</i>                                                       | Olafsson & Thorpe 2016 |
| T17                                      | <i>MATα ADE2 leu2-3,112 TRP1 lys2Δ MTW1-YFP RAD5 mad3Δ::KANMX</i>                                                       | This Study             |
| T18                                      | <i>MATα ADE2 leu2-3,112 TRP1 lys2Δ MTW1-YFP RAD5 bub1Δ::KANMX</i>                                                       | This Study             |
| T19                                      | <i>MATα ADE2 leu2-3,112 TRP1 lys2Δ MTW1-YFP RAD5 bub3Δ::KANMX</i>                                                       | This Study             |
| T414                                     | <i>MATa NUF2-GFP::HIS3 mad3Δ::KANMX</i>                                                                                 | Olafsson & Thorpe 2015 |
| T415                                     | <i>MATa NNF1-GFP::HIS3 mad3Δ::KANMX</i>                                                                                 | Olafsson & Thorpe 2015 |
| T416                                     | <i>MATa MTW1-GFP::HIS3 mad3Δ::KANMX</i>                                                                                 | Olafsson & Thorpe 2015 |
| T417                                     | <i>MATa CDC14-GFP::HIS3 mad3Δ::KANMX</i>                                                                                | Olafsson & Thorpe 2015 |
| T418                                     | <i>MATa KRE28-GFP::HIS3 mad3Δ::KANMX</i>                                                                                | Olafsson & Thorpe 2015 |
| T419                                     | <i>MATa NSL1-GFP::HIS3 mad3Δ::KANMX</i>                                                                                 | Olafsson & Thorpe 2015 |
| T420                                     | <i>MATa CEP3-GFP::HIS3 mad3Δ::KANMX</i>                                                                                 | Olafsson & Thorpe 2015 |
| T421                                     | <i>MATa DAD3-GFP::HIS3 mad3Δ::KANMX</i>                                                                                 | Olafsson & Thorpe 2015 |
| T422                                     | <i>MATa BIK1-GFP::HIS3 mad3Δ::KANMX</i>                                                                                 | Olafsson & Thorpe 2015 |
| T423                                     | <i>MATa BUB3-GFP::HIS3 mad3Δ::KANMX</i>                                                                                 | Olafsson & Thorpe 2015 |
| T424                                     | <i>MATa MIF2-GFP::HIS3 mad3Δ::KANMX</i>                                                                                 | Olafsson & Thorpe 2015 |
| T425                                     | <i>MATa CBF1-GFP::HIS3 mad3Δ::KANMX</i>                                                                                 | Olafsson & Thorpe 2015 |
| T426                                     | <i>MATa SLI15-GFP::HIS3 mad3Δ::KANMX</i>                                                                                | Olafsson & Thorpe 2015 |
| T427                                     | <i>MATa AME1-GFP::HIS3 mad3Δ::KANMX</i>                                                                                 | Olafsson & Thorpe 2015 |
| T428                                     | <i>MATa MCM21-GFP::HIS3 mad3Δ::KANMX</i>                                                                                | Olafsson & Thorpe 2015 |
| T429                                     | <i>MATa CTF19-GFP::HIS3 mad3Δ::KANMX</i>                                                                                | Olafsson & Thorpe 2015 |
| T430                                     | <i>MATa STU2-GFP::HIS3 mad3Δ::KANMX</i>                                                                                 | Olafsson & Thorpe 2015 |
| T431                                     | <i>MATa DSN1-GFP::HIS3 mad3Δ::KANMX</i>                                                                                 | Olafsson & Thorpe 2015 |
| T594                                     | <i>MATa BUB1-GFP::HIS3 mad3Δ::KANMX</i>                                                                                 | This Study             |
| T595                                     | <i>MATa SPC105-GFP::HIS3 mad3Δ::KANMX</i>                                                                               | This Study             |
| T596                                     | <i>MATa NDC80-GFP::HIS3 mad3Δ::KANMX</i>                                                                                | This Study             |
| T603                                     | <i>MATa DAD1-GFP::HIS3 mad3Δ::KANMX</i>                                                                                 | This Study             |
| T604                                     | <i>MATa DAD4-GFP::HIS3 mad3Δ::KANMX</i>                                                                                 | This Study             |
| T605                                     | <i>MATa BIM1-GFP::HIS3 mad3Δ::KANMX</i>                                                                                 | This Study             |
| T607                                     | <i>MATα ADE2 leu2-3,112 his3-11,15 URA3 LYS2 can1-100 trp1-1 cdc20::prMET3-CDC20::TRP1 MTW1-YFP Turq2-TUB1::HIS3MX6</i> | This Study             |
| T621                                     | <i>MATa ADE2 trp1-1 LYS2 his3-11,15 ura3-1 SPC42-RFP::HYGMX DAD4-YFP::NATMX Turq2-TUB1::HIS3MX6</i>                     | This Study             |
| YMB54                                    | <i>MATa ura3-52 lys2-801 ade2-101 his3D200 leu2D1 spt4-138</i>                                                          | Basrai et al. 1996     |

|          |                                                                                                                                                                                               |            |
|----------|-----------------------------------------------------------------------------------------------------------------------------------------------------------------------------------------------|------------|
| PT285-7B | <i>MAT<math>\alpha</math> his3<math>\Delta</math>1 leu2<math>\Delta</math>0 trp1-1 cdc20::prMET3-CDC20::TRP1 SMC3-CFP::KANMX CSE4-YFP (internal)::HIS3MX6</i>                                 | This study |
| T682     | <i>MAT<math>\alpha</math> CEN1-16::Gal-KI-URA3 spt4<math>\Delta</math>::KANMX</i>                                                                                                             | This study |
| T360     | <i>MAT<math>\alpha</math> CEN1-16::Gal-KI-URA3 MTW1-YFP::HIS3</i>                                                                                                                             | This study |
| T738     | <i>MAT<math>\alpha</math> CEN1-16::Gal-KI-URA3 MTW1-YFP::HIS3 spt4<math>\Delta</math>::KANMX</i>                                                                                              | This study |
| T739     | <i>MAT<math>\alpha</math> ADE2 leu2-3,112 his3-11,15 URA3 LYS2 can1-100 trp1-1 cdc20::prMET3-CDC20::TRP1 MTW1-YFP spt4<math>\Delta</math>::KANMX</i>                                          | This study |
| T692     | <i>MAT<math>\alpha</math> ADE2 trp1-1 LYS2 his3-11,15 SPC42-RFP::HYGMX DAD4-YFP::NATMX Turq2-TUB1::URA3</i>                                                                                   | This study |
| T670     | <i>MAT<math>\alpha</math> his3<math>\Delta</math>1 leu2<math>\Delta</math>0 lys2<math>\Delta</math>0 ura3<math>\Delta</math>0 CSE4-YFP (internal)::HIS3MX6 spt4<math>\Delta</math>::KANMX</i> | This study |
| T671     | <i>MAT<math>\alpha</math> his3<math>\Delta</math>1 leu2<math>\Delta</math>0 met15<math>\Delta</math>0 ura3<math>\Delta</math>0 AME1-GFP::HIS3MX6 spt4<math>\Delta</math>::KANMX</i>           | This study |
| T672     | <i>MAT<math>\alpha</math> his3<math>\Delta</math>1 leu2<math>\Delta</math>0 met15<math>\Delta</math>0 ura3<math>\Delta</math>0 MTW1-GFP::HIS3MX6 spt4<math>\Delta</math>::KANMX</i>           | This study |
| T673     | <i>MAT<math>\alpha</math> his3<math>\Delta</math>1 leu2<math>\Delta</math>0 met15<math>\Delta</math>0 ura3<math>\Delta</math>0 KRE28-GFP::HIS3MX6 spt4<math>\Delta</math>::KANMX</i>          | This study |
| T674     | <i>MAT<math>\alpha</math> his3<math>\Delta</math>1 leu2<math>\Delta</math>0 met15<math>\Delta</math>0 ura3<math>\Delta</math>0 NDC80-GFP::HIS3MX6 spt4<math>\Delta</math>::KANMX</i>          | This study |
| T675     | <i>MAT<math>\alpha</math> his3<math>\Delta</math>1 leu2<math>\Delta</math>0 met15<math>\Delta</math>0 ura3<math>\Delta</math>0 DAD3-GFP::HIS3MX6 spt4<math>\Delta</math>::KANMX</i>           | This study |

| List of plasmids: |                                                             |                        |
|-------------------|-------------------------------------------------------------|------------------------|
| Plasmid           | Description (promoter, genetic construct, selection marker) | Reference              |
| pHT4              | <i>pCUP1 GBP LEU2</i>                                       | Olafsson & Thorpe 2015 |
| pHT10             | <i>pCUP1 MTW1-GBP LEU2</i>                                  | Olafsson & Thorpe 2015 |
| pHT99             | <i>pCUP1 NAT</i>                                            | Olafsson & Thorpe 2015 |
| pHT103            | <i>pGAL1 LEU2</i>                                           | Olafsson & Thorpe 2016 |
| pHT199            | <i>pGAL1 GBP LEU2</i>                                       | Olafsson & Thorpe 2016 |
| pHT208            | <i>pCUP1 DAD2 LEU2</i>                                      | Berry et al. 2016      |
| pHT234            | <i>pCUP1 DAD2-GBP LEU2</i>                                  | Berry et al. 2016      |
| pHT210            | <i>pCUP1 NUF2 LEU2</i>                                      | Olafsson & Thorpe 2015 |
| pHT211            | <i>pCUP1 NUF2-GBP LEU2</i>                                  | Olafsson & Thorpe 2015 |
| pHT296            | <i>pCUP1 MTW1 LEU2</i>                                      | Olafsson & Thorpe 2015 |
| pHT310            | <i>pCUP1 CBF1 LEU2</i>                                      | Olafsson & Thorpe 2015 |
| pHT311            | <i>pCUP1 CTF19 LEU2</i>                                     | Olafsson & Thorpe 2015 |
| pHT312            | <i>pCUP1 CTF19-GBP LEU2</i>                                 | Olafsson & Thorpe 2015 |
| pHT313            | <i>pCUP1 MIF2 LEU2</i>                                      | Olafsson & Thorpe 2015 |
| pHT314            | <i>pCUP1 MIF2-GBP LEU2</i>                                  | Olafsson & Thorpe 2015 |
| pHT318            | <i>pCUP1 CNN1 LEU2</i>                                      | Olafsson & Thorpe 2015 |
| pHT319            | <i>pCUP1 CNN1-GBP LEU2</i>                                  | Olafsson & Thorpe 2015 |
| pHT320            | <i>pCUP1 GBP-CNN1 LEU2</i>                                  | This study             |
| pHT335            | <i>pCUP1 SKP1 LEU2</i>                                      | Olafsson & Thorpe 2015 |
| pHT336            | <i>pCUP1 SKP1-GBP LEU2</i>                                  | Olafsson & Thorpe 2015 |
| pHT337            | <i>pCUP1 CTF3 LEU2</i>                                      | Olafsson & Thorpe 2015 |
| pHT338            | <i>pCUP1 CTF3-GBP LEU2</i>                                  | Olafsson & Thorpe 2015 |
| pHT339            | <i>pCUP1 KRE28 LEU2</i>                                     | Olafsson & Thorpe 2015 |
| pHT340            | <i>pCUP1 KRE28-GBP LEU2</i>                                 | Olafsson & Thorpe 2015 |
| pHT341            | <i>pCUP1 CHL4 LEU2</i>                                      | Olafsson & Thorpe 2015 |
| pHT342            | <i>pCUP1 CHL4-GBP LEU2</i>                                  | Olafsson & Thorpe 2015 |
| pHT343            | <i>pCUP1 GBP-CBF1 LEU2</i>                                  | This study             |
| pHT425            | <i>pCUP1 CDC5-GBP LEU2</i>                                  | Mishra et al. 2019     |
| pHT426            | <i>pCUP1 CDC5 LEU2</i>                                      | This study             |

|        |                                                      |                    |
|--------|------------------------------------------------------|--------------------|
| pHT442 | <i>pCUP1 cdc5-K110A-GBP LEU2 (cdc5-kd-GBP)</i>       | Mishra et al. 2019 |
| pHT444 | <i>pCUP1 cdc5-T242A-GBP LEU2 (cdc5-kd-GBP)</i>       | This study         |
| pHT503 | <i>pCUP1 cdc5-T242A-WHK/FAM-GBP LEU2</i>             | This study         |
| pHT504 | <i>pCUP1 CDC5-WHK/FAM-GBP-RFP LEU2</i>               | This study         |
| pHT568 | <i>pGAL1 CDC5ΔC-AME1 LEU2</i>                        | This study         |
| pHT569 | <i>pGAL1 cdc5ΔC-K110A-AME1 LEU2 (cdc5ΔC-kd-AME1)</i> | This study         |
| pHT573 | <i>pGAL1 CDC5 LEU2</i>                               | This study         |
| pHT574 | <i>pGAL1 cdc5-K110A LEU2</i>                         | This study         |
| pHT580 | <i>pGAL1 CDC5ΔC-GBP LEU2</i>                         | This study         |
| pHT581 | <i>pGAL1 cdc5ΔC-K110A-GBP LEU2 (cdc5ΔC-kd-GBP)</i>   | This study         |
| pHT680 | <i>pGAL1 PSH1 NAT</i>                                | This study         |
| pHT632 | <i>pGAL1 BIM1 NAT</i>                                | This study         |
| pHT636 | <i>pGAL1 BIK1 NAT</i>                                | This study         |
| pHT781 | <i>pGAL1 CDC5ΔC-AME1 HYG</i>                         | This study         |
| pHT782 | <i>pGAL1 cdc5ΔC-K110A-AME1 HYG (cdc5ΔC-kd-AME1)</i>  | This study         |
| pHT775 | <i>pGAL1 CBF1 NAT</i>                                | This study         |
| pHT723 | <i>pCUP1 SPT4 NAT</i>                                | This study         |
| pHT724 | <i>pGAL1 SPT4 NAT</i>                                | This study         |
| pHT684 | <i>pGAL1 ame1-7A LEU2</i>                            | This study         |
| pHT686 | <i>pGAL1 CDC5ΔC-ame1-7A LEU2</i>                     | This study         |
