# Supplementary material for: Polo kinase recruitment via the constitutive centromere-associated network at the kinetochore elevates centromeric RNA
Source: PubMed Central journal article supplement (PMC7455000; doi:10.1371/journal.pgen.1008990), 2020-08-18
Supplement: pgen.1008990.s002.pdf [file pgen.1008990.s002.pdf]

**Table S2. Primers used for reverse transcription PCR**

| <b>Gene or CEN RNA</b> | <b>Primer name (Forward primer) 5' &gt; 3'</b> | <b>Primer name (Reverse primer) 5' &gt; 3'</b> | <b>Product size</b> | <b>Reference</b>         |
|------------------------|------------------------------------------------|------------------------------------------------|---------------------|--------------------------|
| CEN1                   | OWYY473<br>TGTAATGATTTAAGTCTTGTCACATGA         | OWYY474<br>AAAATACTTTGACTGCTTCGGAA             | 243 bp              | Ling and Yuen 2019       |
| CEN3                   | OWYY1025<br>ACATGGCATGGCGATCAGCG               | OWYY1027<br>TGAGCAAAACTTCCACCAGTAAACG          | 263 bp              | Ling and Yuen 2019       |
| CEN8                   | OWYY1044<br>AACTCCAACAATTACACATCCACAAAACG      | OWYY1045<br>AGAGATTTGGGCTTGAGGAAGCG            | 297 bp              | Ling and Yuen 2019       |
| CDC28                  | CDC28-F<br>CTTGAGAAAGTCGGTGAAGG                | CDC28-R<br>GATTCTTGGAAGTAGGGTG                 | 0.86 kb             | Ohkuni and Kitagawa 2011 |
